# Supplementary material for: Neurotrophic Factors NGF, GDNF and NTN Selectively Modulate HSV1 and HSV2 Lytic Infection and Reactivation in Primary Adult Sensory and Autonomic Neurons
Source: PubMed Central journal article supplement (PMC5371893; doi:10.3390/pathogens6010005), 2017-02-07

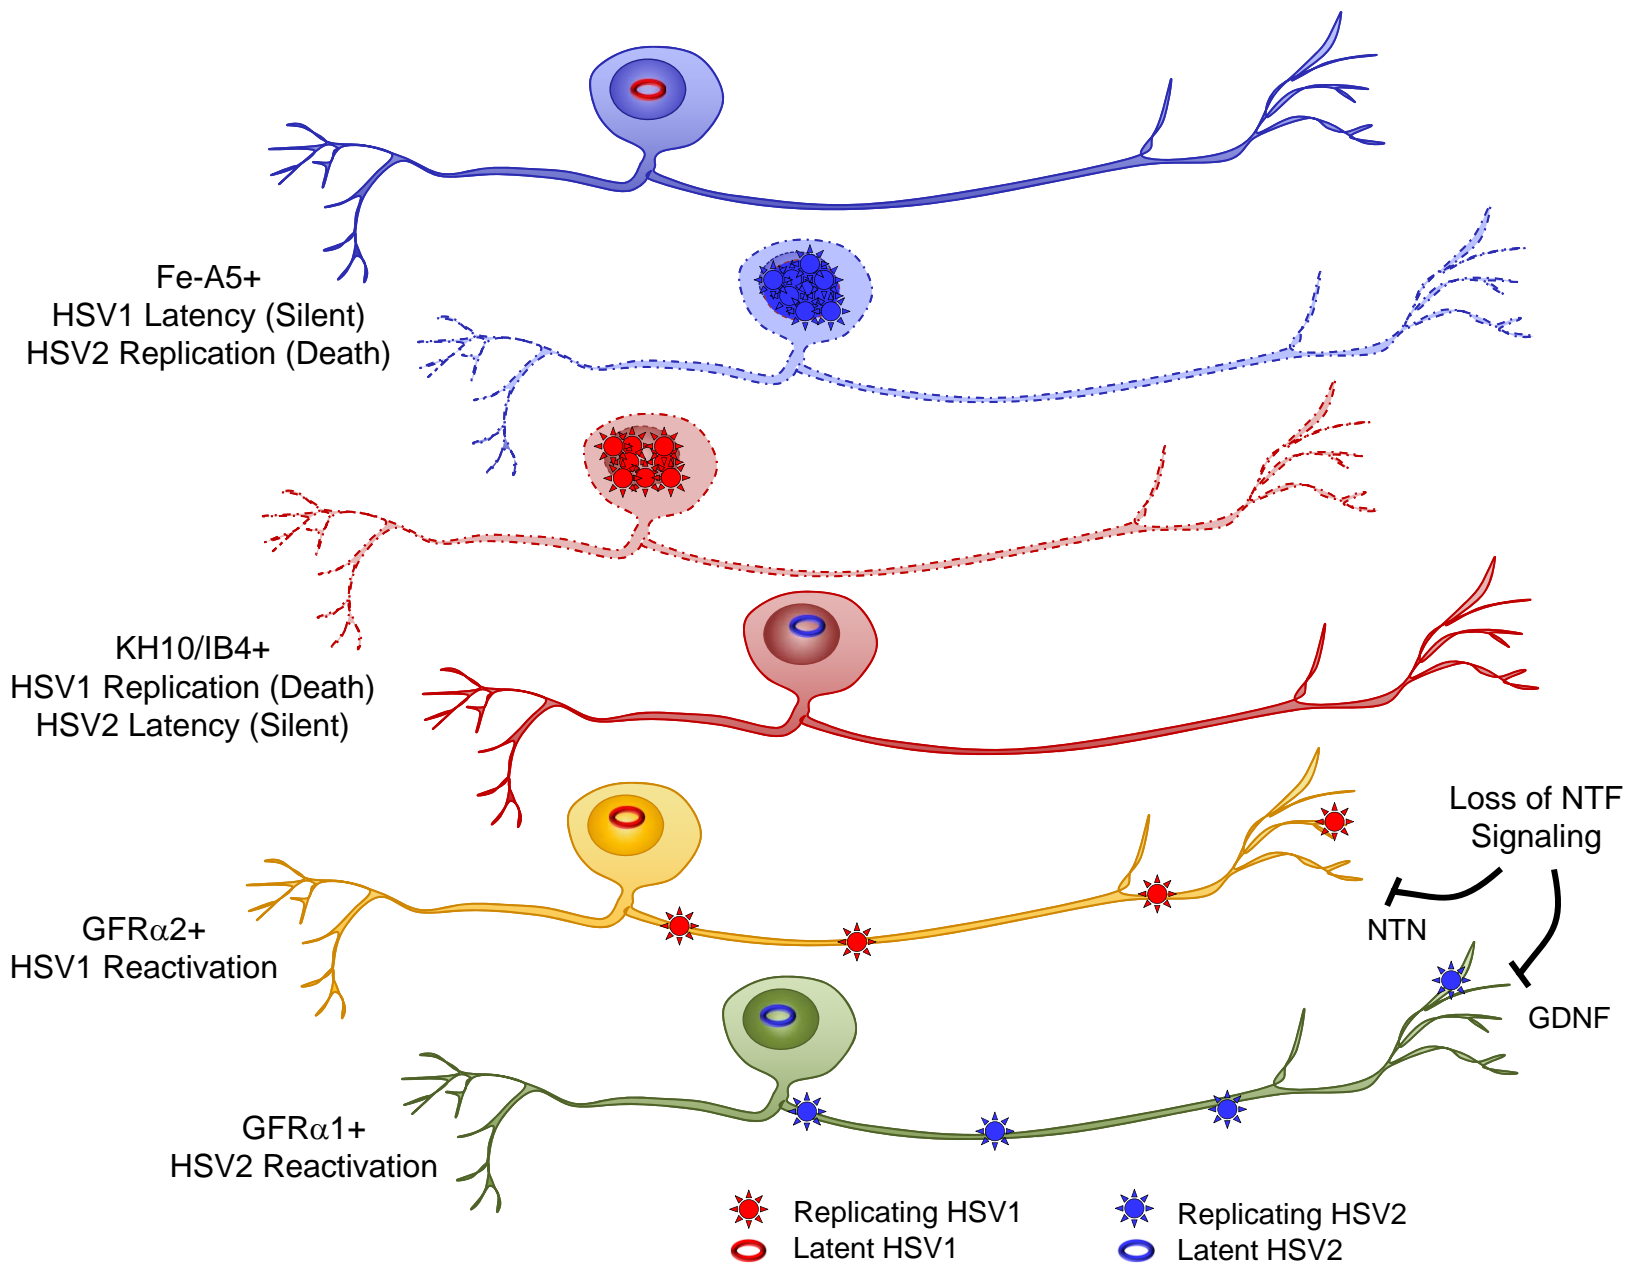

Supplement: pathogens-06-00005-s001.pdf [file pathogens-06-00005-s001.pdf]
